# Supplementary material
Source: PubMed Central journal article supplement (PMC3901842)
Supplement: NIHMS543024-supplement-Permission_for_Figure_2.pdf [file NIHMS543024-supplement-Permission_for_Figure_2.pdf]

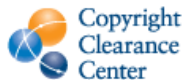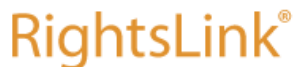

My Orders

My Library

My Profile

Welcome ehrin.armstrong@gmail.com

Log out | Help

My Orders > Orders > All Orders

## License Details

This is a License Agreement between Ehrin J Armstrong ("You") and Wolters Kluwer Health ("Wolters Kluwer Health"). The license consists of your order details, the terms and conditions provided by Wolters Kluwer Health, and the [payment terms and conditions](#).

[Get the printable license.](#)

|                                          |                                                                                                                                                                 |
|------------------------------------------|-----------------------------------------------------------------------------------------------------------------------------------------------------------------|
| License Number                           | 3040801487734                                                                                                                                                   |
| License date                             | Dec 02, 2012                                                                                                                                                    |
| Licensed content publisher               | Wolters Kluwer Health                                                                                                                                           |
| Licensed content publication             | Circulation                                                                                                                                                     |
| Licensed content title                   | Differential Clinical Responses to Everolimus-Eluting and Paclitaxel-Eluting Coronary Stents in Patients With and Without Diabetes MellitusClinical Perspective |
| Licensed content author                  | Gregg. W. Stone, Elvin Kedhi, Dean J. Kereiakes, Helen Parise, Martin Fahy, Patrick W. Serruys, Pieter C. Smits                                                 |
| Licensed content date                    | Aug 23, 2011                                                                                                                                                    |
| Volume number                            | 124                                                                                                                                                             |
| Issue Number                             | 8                                                                                                                                                               |
| Type of Use                              | Journal/Magazine                                                                                                                                                |
| Requestor type                           | Academic/Educational                                                                                                                                            |
| Format                                   | Print and electronic                                                                                                                                            |
| Portion                                  | Figures/table/illustration                                                                                                                                      |
| Number of figures/tables/illustrations   | 1                                                                                                                                                               |
| Author of this Wolters Kluwer article    | No                                                                                                                                                              |
| Will you be translating?                 | No                                                                                                                                                              |
| Number of copies                         | 1                                                                                                                                                               |
| Title of new article                     | Coronary Artery Revascularization in Patients with Diabetes: Current Concepts and Future Directions                                                             |
| Publication the new article is in        | JACC (Intended publication)                                                                                                                                     |
| Publisher of new article                 | Elsevier                                                                                                                                                        |
| Author of new article                    | Ehrin Armstrong and Jason Rogers                                                                                                                                |
| Expected publication date of new article | Mar 2013                                                                                                                                                        |
| Estimated size of new article (pages)    | 30                                                                                                                                                              |
| Billing Type                             | Credit Card                                                                                                                                                     |
| Credit card info                         | Visa ending in 4866                                                                                                                                             |
| Credit card expiration                   | 03/2014                                                                                                                                                         |
| <b>Total</b>                             | <b>115.00 USD</b>                                                                                                                                               |

[← Back](#)

Copyright © 2013 Copyright Clearance Center, Inc. All Rights Reserved. [Privacy statement](#) . Comments? We would like to hear from you. E-mail us at [customercare@copyright.com](mailto:customercare@copyright.com)
